# Supplementary material for: Arrhythmogenic effects of mutated L-type Ca2+-channels on an optogenetically paced muscular pump in Caenorhabditis elegans
Source: Sci Rep. 2015 Sep 24;5:14427. doi: 10.1038/srep14427 (PMC4585839; doi:10.1038/srep14427)
Supplement: Supplementary Information [file srep14427-s1.pdf]

# Arrhythmogenic effects of mutated L-type $\text{Ca}^{2+}$ -channels on an optogenetically paced muscular pump in *Caenorhabditis elegans*

Christina Schüler<sup>1,2,3\*</sup>, Elisabeth Fischer<sup>1,2,3,\*</sup>, Lior Shaltiel<sup>1,2,4</sup>, Wagner Steuer Costa<sup>1,2</sup> & Alexander Gottschalk<sup>1,2,3,5</sup>

<sup>1</sup> Buchmann Institute for Molecular Life Sciences, Goethe University, Max von Laue Strasse 15, D-60438 Frankfurt, Germany

<sup>2</sup> Institute of Biochemistry, Goethe University, Max von Laue Strasse 9, D-60438 Frankfurt, Germany

<sup>3</sup> Cluster of Excellence Frankfurt – Macromolecular Complexes, Goethe University, Max von Laue Strasse 15, D-60438 Frankfurt, Germany

<sup>4</sup> Present address: LipoCure Ltd, Hadassah Ein Kerem Campus, Minrav Building, Jerusalem Biotechnology Park, POB 12235, Jerusalem, 9112102 Israel

\* these authors contributed equally

<sup>5</sup> to whom correspondence should be addressed: [a.gottschalk@em.uni-frankfurt.de](mailto:a.gottschalk@em.uni-frankfurt.de)

## Supplementary Information

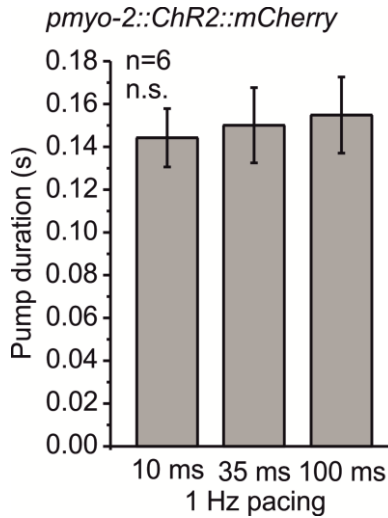

**Supplementary Fig. S1: Pump duration is not altered by length of stimulation light pulse (10 - 100 ms)**

Pacing with 10, 35 and 100 ms (470 nm) has no effect on pump duration as deduced from EPGs.

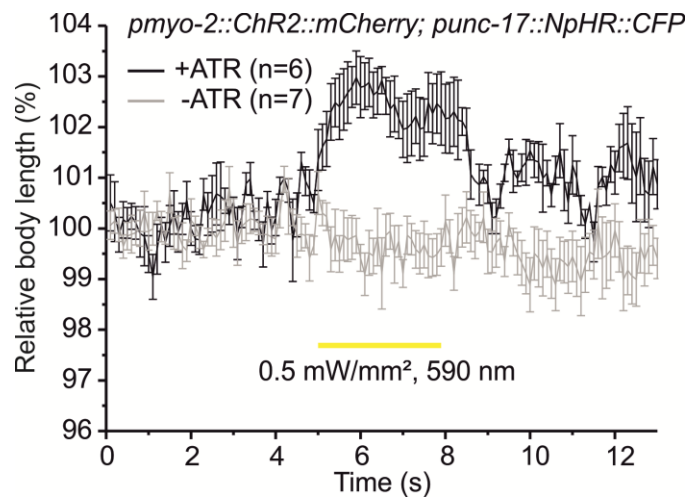

**Supplementary Fig. S2: Cholinergic neuron hyperpolarization induces body relaxation**

Animals expressing ChR2 in PMCs and NpHR (halorhodopsin) in cholinergic neurons were illuminated with 570-610 nm light (0.5 mW/mm<sup>2</sup>) for 3 s. Analysis of averaged ( $\pm$  S.E.M.), normalized body length deduced from videos (10 fps) verifies that cholinergic neuron hyperpolarization is effective and induces muscle relaxation (black trace, n=6 animals treated with ATR). No effects are observed in animals grown the absence of ATR (grey trace, n=7 animals). Illumination period is indicated by a yellow bar.

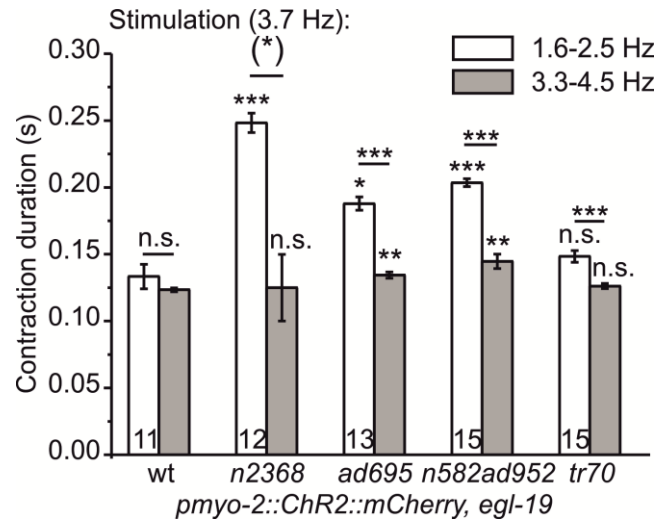

**Supplementary Fig. S3: Detailed analysis of contraction duration obtained by kymographic analysis**

Detailed analysis shows strongly increased contraction durations only for the 2 Hz pumping periods of *egl-19* mutants compared to wild type (wt). Statistically significant differences: t-test with Bonferroni correction (\*\*\* $P < 0.001$ ; \*\* $P < 0.01$ ).

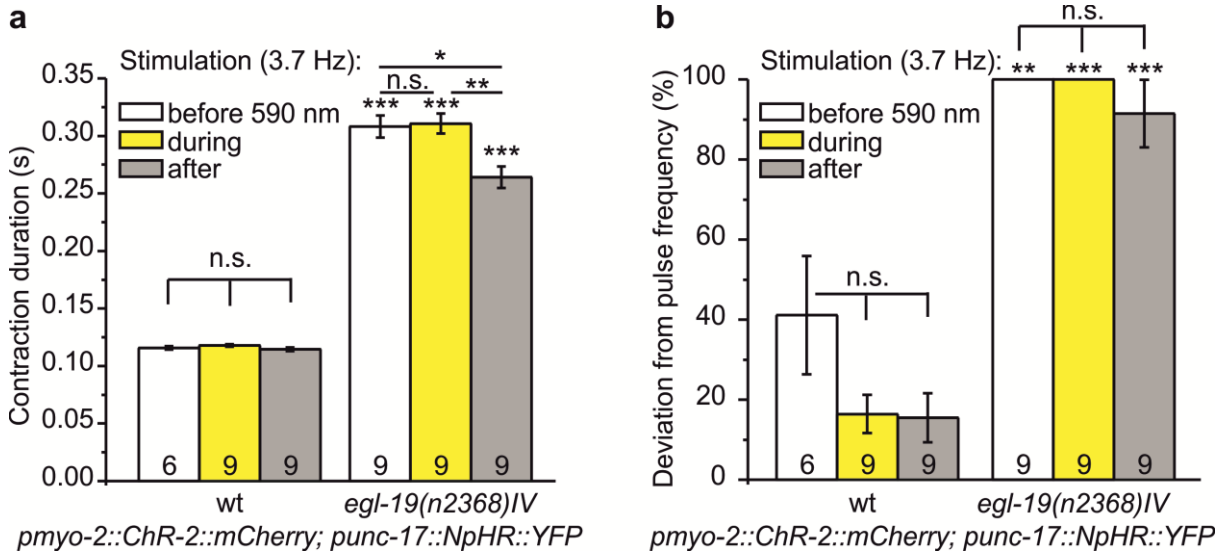

**Supplementary Fig. S4: No neuronal effect on contraction duration and deviation from 3.7 Hz pumping of *egl-19* mutants**

**A)** Contraction duration as measured by kymographs upon ongoing ChR2 PMC photostimulation at 3.7 Hz, combined with photoinhibition of cholinergic neurons by NpHR (yellow), in *egl-19(n2368)* mutants, compared to wild type (wt). **B)** Fraction of time the animals in A) showed deviation from the pace frequency before or after cholinergic neuron photoinhibition. Statistically significant differences: t-test with Bonferroni correction (\*\*\*P<0.001; \*\*P< 0.01; \*P<0.05).

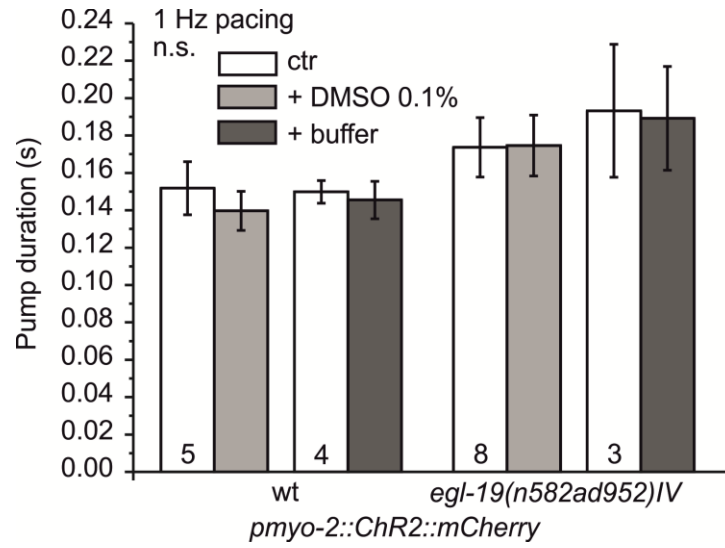

**Supplementary Fig. S5: No effect of 0.1% DMSO on pump duration**

Pump duration was analyzed by EPGs of 1 Hz optically paced pharynxes, of allele *n582ad952* and compared to wild type (wt), in control conditions, or 2 min after incubation with 0.1% DMSO, or after application of buffer (EmD50).

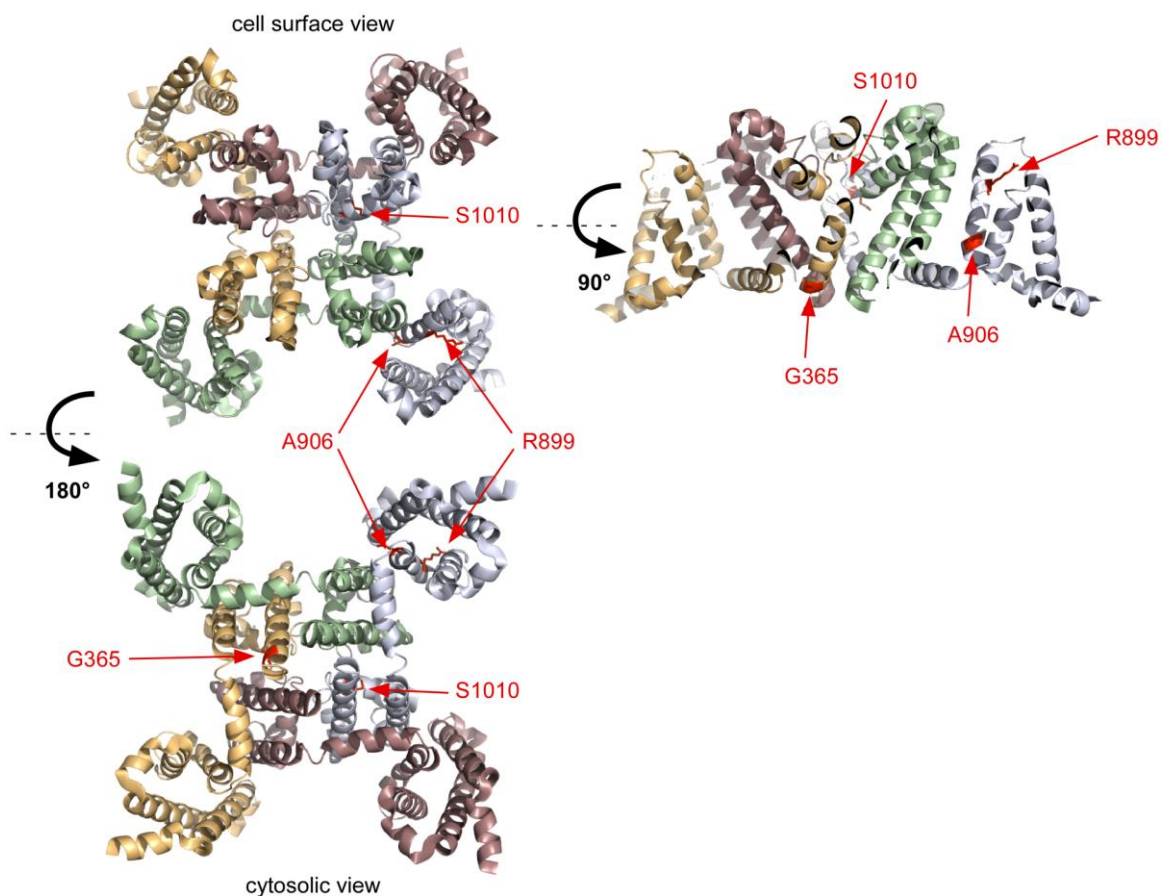

**Supplementary Fig. S6: Structure model of NavAb as EGL-19 surrogate with positions of the analyzed *egl-19* mutations indicated**

Structural model of NavAb (PDB file 3RVZ), as a surrogate for the EGL-19 structure, with relevant, mutated amino acids superimposed (red) over positions of NavAb that align with the EGL-19 sequence (see **Supplementary Fig. S7**).

### 1st module

```

EGL-19      50 -aqrkplrqtnvversersllclslnnpirkklcisivewkpfeflilfmicanciaiaiyqypagdsdy
Cav1.2 human 100 -----pprallcltlnknpirracisivewkpfefiilltifancvalaiyipfeddsna
navAB (3RVZ) 1 mdykdddkgslvprgshmylrit-----nivessfftkfiilylivngitmtgletsktfmgqsfg

EGL-19      119 kntlletieyvfivvftiecvlkivamgfmfhpsaylrnawnildfiivviglvstilskmsiq-----
Cav1.2 human 155 tnsnlerveylfliiftveaflkviaygllfhpnaylrngwnlldfiivvvglfsaileqatkadganal
navAB (3RVZ) 61 vytltl--fnqivitiftieilriyv----hrisffkdpwslfdffvvaishlvp-----ss-----

EGL-19      183 ----gfdvkalrafrvrlrplrlvsgvpslqvlnailramiplhlhiallvfvlilyaiagilelfcgkl
Cav1.2 human 225 ggkgagfdvkalrafrvrlrplrlvsgvpslqvlnsiikamvplhlhiallvfvlilyaiagilelfcgkm
navAB (3RVZ) 112 ----gfei--lrvlrvlrlfrlvtavpqrkivsalisvipgmlsvialmtlffiyifaimatqlf----

EGL-19      248 hstcidpa--tgqlaqkdpctpcgtdegsafkcpssdsltngvrwecssnttwpqpnnngitnfdnfgla
Cav1.2 human 295 hktcynqegiadvpaeddpdpcalet-ghgrqcq-ngtvckpg-----wdgpkhgitnfdnfafa
navAB (3RVZ) 171 -----gerfp-----ew-----fgtlges

EGL-19      316 mltvfqcvslegwtdvmyvndavg-rewpwiyfvtlvilgsffvlnlvlgvlsgefskerekararglf
Cav1.2 human 353 mltvfqcitmegwtdvlyvndavg-rdwpwiyfvtliiigsffvlnlvlgvlsgefskerekakargdf
navAB (3RVZ) 185 fytlfqvmtesws--mgivrplmevpyawvfifpfifvtfvminlvlaicvdamaillnqkeeqhiid
                                           G365 S372

EGL-19      385 q-----kfre----kqleedlkg-----
Cav1.2 human 422 q-----klre----kqleedlkgylwdwitqaedidpe
navAB (3RVZ) 253 evqshedninneiiklreeivelkeliktslkn-----

```

### 2nd module

```

EGL-19      440 -vedvrpskwaarmk-rlekl-----nrrcrracrllvksqtfywlvillvllntltl---tsehy
Cav1.2 human 480 aggdiegcgarlahriskskfsrywrwnrfcrkrcraavksnvfywlviflvfntlti---asehy
navAB (3RVZ) 1 mdykdddkgslvp-rgsh-----ylr---itnivessfftkfiilylivngitmtgletsktf

EGL-19      496 gqsewldhfgtmanlffvilfsmemllkmyslgfttytsqfnrfdcfvissilefvlvfydlmkplgv
Cav1.2 human 547 ngpnwltveqdtankallalftaemllkmyslgfayfvslnrfdcfvvcgiletilvetkimsplgi
navAB (3RVZ) 56 mqs--fgvyttlfnqivitiftieilriy-vhrisffkdpwslfdffvvaishlvp-----tssgf

EGL-19      566 svlrsarllrifkvtkywtslrnlvssllnsrslsllllflfivifallgmqvfggkfnfnpggkpkp
Cav1.2 human 617 svlrcvrlrlrifkitrywnslslvasllnsrsiasllllflfiliifslgmqlfggkfnfdemqtr-
navAB (3RVZ) 114 eilrvlrvlrlfrlvtavpqrkivsalisvipgmlsvialmtlffiyifaimatqlfgerf---pew---

EGL-19      636 ranfdtfvqalltfvqiltgedwntvmyhgiesfggvgtlgi---vciiyyivlficgnyillnvflaia
Cav1.2 human 686 rstfdnfpqslttvfqiltgedwnsvmydgimayggpsfpgml---vciiyfiilficgnyillnvflaia
navAB (3RVZ) 178 ---fgtlgesfytlfqvmtesw-----smgivrplmevpyawvfifpfifvtfvminlvvaic

EGL-19      703 vdnladadsltnaekeeeqgeiegedeefee-gedegeehgmdp---egdeemtsarprrm
Cav1.2 human 753 vdnladaesltsaqkeeee---ekerkklartaspekkqelvekpvageskeekielksit-
navAB (3RVZ) 236 vdama---iln---qkeeqhiidevqshed-ninneiklreei---velkeliktslkn-

```

### 3rd module

```

EGL-19      750 --eemtsarprrmsevpaaastvkpipkasslflshtnsfrvfcnmvvnhsyftnavlfcilvssamlaa
Cav1.2 human 850 epempvgprprplselhlkekavmppeasaffifssnnrfrlqchrivndtftnlilffillssislaa
navAB (3RVZ) 1 -----mdykdddkgslvprgshmy-lritn-----ivessfftkfiilylivngitmtgl

EGL-19      818 edplqanstrnmilnyfd-----yfftsvftveitlkvivfglvfhkgsfcrnaf
Cav1.2 human 920 edpvqhtsfrnhilfyfdivfttftieialkilgnadyvftsiftleilkmtaygaflhkgsfcrnyf
navAB (3RVZ) 50 etsktfmgqsfgvyttlfn-----qivitiftieilriyv----hrisffkdpw

EGL-19      868 nlldilvvavsltsfvlrtdamsvvkrlrvlrlplraalnarakglkhvqvqvavktignimlvtfml
Cav1.2 human 990 nlldllvsvslisfgiqessainvvkrlrvlrlplraalnarakglkhvqvqvavktignivivtll
navAB (3RVZ) 95 slfdffvvaishl-----vptssgfeilrvlrlfrlvtavpqrkivsalisvipgmlsvialmtl
                                           R899 A906

EGL-19      938 qmfaiigvqlfkgtfflndlskmtaeacergeyihyedgdptkpvskrvsnndfnfdnvadamislf
Cav1.2 human 1060 qmfaiagvqlfkgtlytcsdsskqtaeackgnitykydgedvndpiqprswenskfddnvlaaammalf
navAB (3RVZ) 159 fyifaimatqlfgerf-----pew-----fgtlgesfytlf

EGL-19      1008 vvsfegwpqillyvaidsneedkgpihnsrgavalffiafiiaffmmnifvgfivtfqnegereyen
Cav1.2 human 1130 tvstfegwpellyrsidshtedkgpiynyrvveisiffiiyiiiaffmmnifvgfivtfqeggeqeykn
navAB (3RVZ) 190 qvmleswsmgiv-----rplmevpyawvfifpfifvtfvminlvvaicvdamaillnqkeeqh
                                           S1010

EGL-19      1078 celdknqrkciefalkakphrryipnrlqyrvwvftsvrafeyvifliivmntvslackhyppssrgfed
Cav1.2 human 1200 celdknqrqcveyalkarplrryipknghqykvwyvvnstyfeylmfvlil-----
navAB (3RVZ) 250 i-idevq-----shedninneiiklreeivelkelikt---slkn-----

```

Supplementary Fig. S7: Sequence alignments of NavAb with each of the first 3 modules of EGL-19

**Supplementary Video 1: Pharynx in electropharyngeogram setup; first spontaneous pumps, then optically paced at 1, 2 and 4 Hz**
